# Supplementary material for: Optimizing hybrid vigor: a comprehensive analysis of genetic distance and heterosis in eggplant landraces
Source: Frontiers journal article supplement (doi:10.3389/fpls.2023.1238870), 2023-08-31
Supplement: Image_1.pdf [file Image_1.pdf]

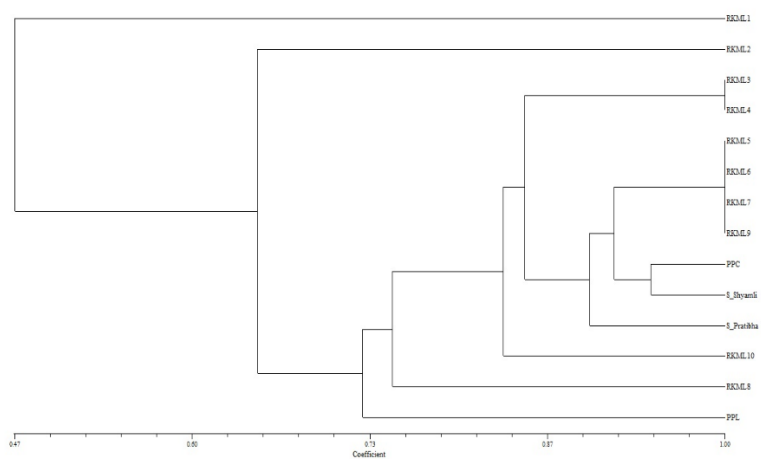

**Supplementary fig.1:** Dendrogram constructed from the SSR data, using Jaccard's coefficient of similarity and UPGMA clustering

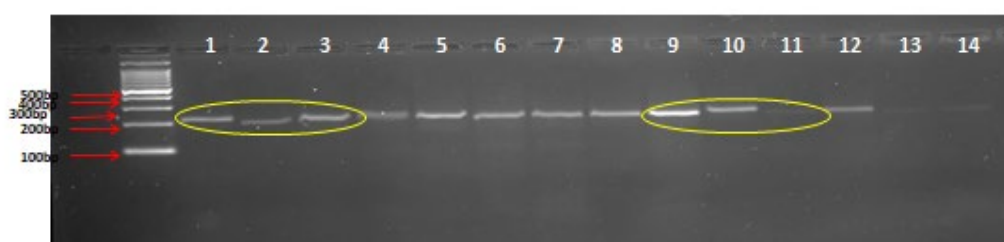

**Supplementary fig. 2:** Banding pattern of SSR locus EM-131 for 14 parental lines of brinjal

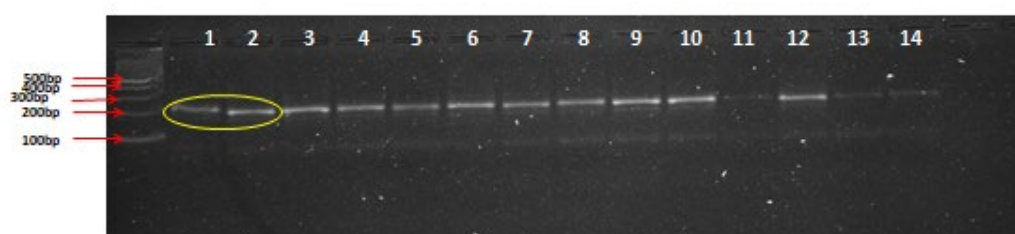

**Supplementary fig. 3:** Banding pattern of SSR locus EM-140 for 14 parental lines of brinjal

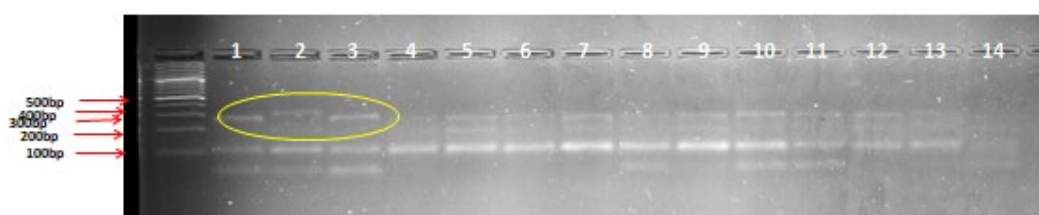

**Supplementary fig. 4:** Banding pattern of SSR locus EM-155 for 14 parental lines of brinjal

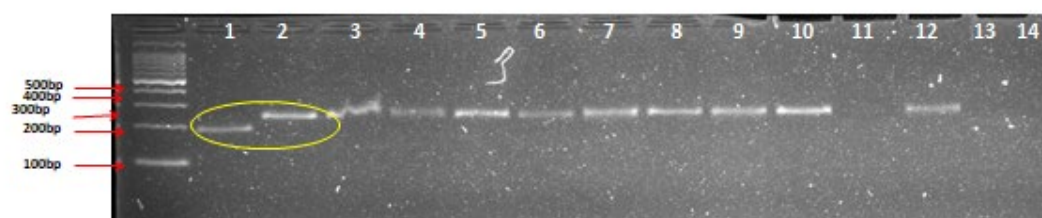

**Supplementary fig. 5:** Banding pattern of SSR locus EM-141 for 14 parental lines of brinjal

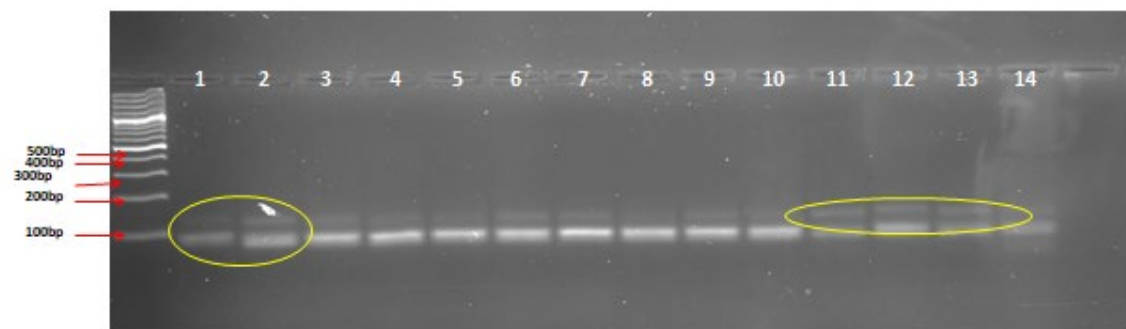

**Supplementary fig. 6:** Banding pattern of SSR locus EM-117 for 14 parental lines of brinjal

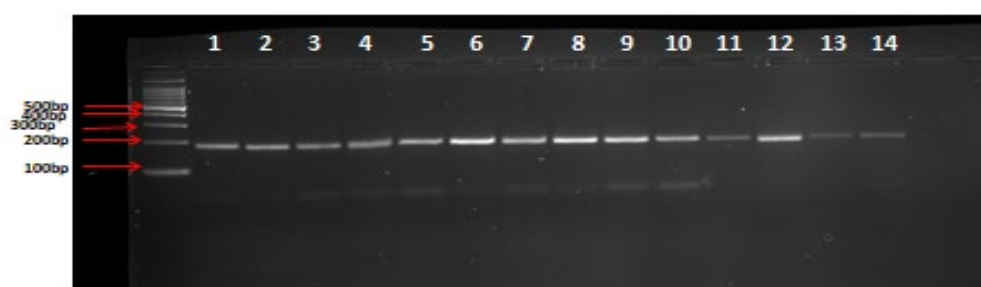

**Supplementary fig. 7:** Banding pattern of SSR locus EM-133 for 14 parental lines of brinjal

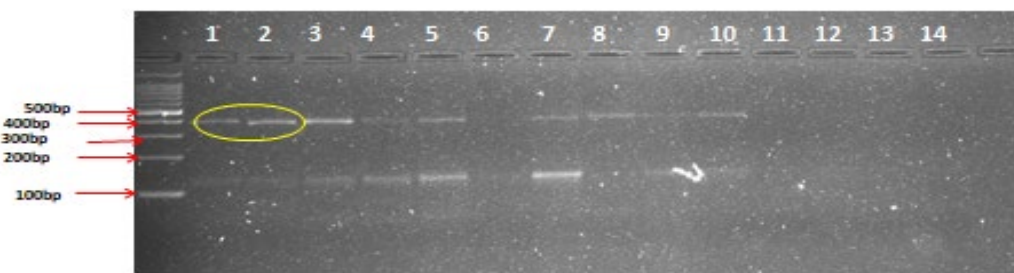

**Supplementary fig. 8:** Banding pattern of SSR locus EM-145 for 14 parental lines of brinjal

Left most lane corresponds to DNA ladder and amplified DNA samples were loaded in the lanes following the order of genotypes as

- |           |                |
|-----------|----------------|
| 1- RKML1  | 8- RKML 11     |
| 2- RKML 2 | 9- RKML 26     |
| 3- RKML 3 | 10- RKML 34    |
| 4- RKML 4 | 11- PPC        |
| 5- RKML 5 | 12- PPL        |
| 6- RKML 6 | 13- S.Pratibha |
| 7- RKML 7 | 14- S.Shyamli  |
