# Supplementary material for: Optimizing hybrid vigor: a comprehensive analysis of genetic distance and heterosis in eggplant landraces
Source: Front Plant Sci. 2023 Aug 31;14:1238870. doi: 10.3389/fpls.2023.1238870 (PMC10501132; doi:10.3389/fpls.2023.1238870)
Supplement: Supplementary file 1 [file DataSheet_1.xlsx]

## Sheet: Sheet1
Entry_Name	Entry	PH_R1	PH_R2	PH_R3	PSNS_R1	PSNS_R2	PSNS_R3	PSEW_R1	PSEW_R2	PSEW_R3	LL_R1	LL_R2	LL_R3	LW_R1	LW_R2	LW_R3	NPB_R1	NPB_R2	NPB_R3	PL_R1	PL_R2	PL_R3	DF_R1	DF_R2	DF_R3	DF50_R1	DF50_R2	DF50_R3	FI_R1	FI_R2	FI_R3	FL_R1	FL_R2	FL_R3	FD_R1	FD_R2	FD_R3	PDL_R1	PDL_R2	PDL_R3	FPP_R1	FPP_R2	FPP_R3	FW_R1	FW_R2	FW_R3	YPP_R1	YPP_R2	YPP_R3
RKML-1	1	58	62	64.5	51.5	51.5	46.6	45.4	46.25	48.4	12.81	15.61	15.12	8.48	10.58	10.41	3	4	4	3.16	4.16	4.18	81	79	76	84	84	84	87	85	80	17.3	16.2	15.6	17.54	17.7	15.8	6.84	6.4	3.9	7.8	6.2	7	146.7	109	132.8	1093	545	595.4
RKML-2	2	45.63	53.75	54.6	58.25	58.25	63.8	56.94	73.31	64	11.02	13.2	13.52	7.91	7.65	7.92	4	5	4	3.37	3.48	3.41	64	64	58	74	71	65	75	74	75	13.6	14.5	14.2	16.6	15	15.9	5.6	4.44	4.2	10	4.2	9.6	92.07	128.6	80.53	971.4	644.2	640.2
RKML-3	3	53.25	56.69	55.6	56.56	56.56	59.8	60.94	61.06	64.4	12.17	14.13	14.94	7.62	7.91	8.57	5	5	4	3.46	3.36	3.12	62	60	60	78	66	68	78	78	72	11.2	14.2	13.5	17.5	21	22.5	5.2	4.42	3.8	7.2	4.2	9.8	140.8	126.8	98.23	846.4	639	899.8
RKML-4	4	60.38	60.25	64.2	65.63	65.63	72.8	60.25	69	74.6	15.05	16.82	17.32	10.25	11.13	12.02	6	5	5	4.55	4.79	5.13	84	80	80	86	86	85	109	92	93	15.9	18.3	17.8	25.8	28.1	27	5.7	6.2	5	6.4	3	6.8	209.4	165.5	232.7	992.4	1215.8	1052.2
RKML-5	5	50.63	55.63	59	57.19	57.19	66.8	61	67.25	69	12.19	14.7	16.46	8.22	9.31	11.28	4	5	5	3.34	3.51	4.2	84	82	84	87	87	87	100	95	100	15.6	15	13.9	27.8	22.88	25	4.6	4.4	4.2	6.4	9.6	7.8	164.3	188.4	133.2	835.4	1361	873.8
RKML-6	6	50.88	47.63	57.9	61	61	67.2	61.88	60.06	71.8	13.53	12.62	15.86	8.7	7.63	9.36	4	5	4	2.34	2.02	2.52	67	63	63	78	70	70	85	78	71	11.3	9.8	10.1	18	18	16.6	3.6	2.88	3.1	14.8	6	19.8	81.2	71.5	43.68	870.6	446.4	822.4
RKML-7	7	63.25	52.88	61.8	74.25	74.25	72	74.75	52.25	82.8	15.6	14.62	18.82	10.49	10.25	13.04	6	6	5	5.08	4.18	6.21	81	80	81	85	84	86	94	94	92	16.9	13.2	13.8	19.7	16.9	18.8	5.3	4.62	5.2	11	5	8	193.2	141.4	102.1	1284.6	655.2	822
RKML-8	8	69.38	58.19	57.4	73	73	69.8	78.75	68.94	74.2	15.77	14.43	16.72	11.26	10.49	12.99	5	5	5	4.97	3.78	5.47	84	84	80	89	89	89	98	98	98	20.2	19.5	17.1	32.1	30.4	26.3	9.2	5.06	5.3	11.8	3.6	4.2	152.8	134	218	1861.8	711	798.8
RKML-9	9	65.63	62.5	57	68.5	68.5	71.6	73.25	70.18	81.6	16.2	15.87	18.2	12.28	12.36	14.55	6	5	5	5.19	5.07	6.14	85	85	86	89	89	89	96	96	96	14.6	17.2	16.2	27.3	25.8	30.2	9.9	4.9	6.1	9.8	5.4	4.6	181	293.4	166	1508.2	1364	728.2
RKML-10	10	53.88	63.81	42.8	58.5	58.5	61	56.5	71.54	64.4	13.06	14.21	15.12	8.34	9.09	9.42	4	4	5	3.04	2.96	3.36	81	83	82	90	90	89	99	99	99	13.1	10.5	10.2	19.2	17.5	17.9	4.2	3.06	3.1	20.2	36.2	14.4	63.99	33.6	62.71	1049.6	1347.4	679
RKML-11	11	63.25	62.5	58	69	69	62	69.38	76.63	65.8	17.83	17.48	16.26	11.67	11.21	10.79	7	6	7	5.68	5.26	4.87	81	77	85	90	85	92	84	92	90	18.7	17.6	17.8	30	25.3	27.4	5.96	4.5	4.44	13	14.4	4	203.83	121.6	311.83	1815	2634	959.4
RKML-12	12	65.75	61.5	63.6	64	64	62.6	64.75	65.81	65.4	14.25	14.7	14.18	9.87	10.22	9.79	4	5	5	3.33	3.91	3.33	86	80	82	93	93	93	102	95	100	18.8	18.2	16.3	24.8	24.6	23.4	4.9	4.2	4.1	9.2	10.2	5.6	182.6	94.8	260.55	1298	1608	1026.2
RKML-13	13	57	55.63	59.2	58.63	58.63	66.4	67.38	65.45	73.2	12.53	12.9	13.09	7.78	8.29	8.05	5	4	5	2.6	2.71	2.52	81	76	83	90	90	90	98	94	98	19.4	15.3	16.5	38.6	15.7	19.5	4.04	5.6	5	15	18.2	10.8	46.27	71.2	81.99	1157.6	1392	768.4
RKML-14	14	65.13	66.75	66	60	60	67.8	61.75	67.5	72.2	13.34	14.61	15.46	9.7	10.13	11.16	5	6	5	3.75	4	3.92	88	85	80	97	97	86	105	98	92	17.4	25	22.4	16.3	19.8	19.5	6.1	5.2	5.5	12.6	15.2	8.8	137.5	113.8	212.4	1808.8	2106.4	1515
RKML-15	15	51.75	50.25	53.8	54.44	54.44	63.2	59.31	67.04	66.2	12.35	12.45	13.65	8.03	8.39	9.48	3	4	3	2.44	2.22	2.36	78	78	74	87	87	86	93	92	90	19.3	15.6	16.1	18.4	21.3	20.5	6.42	4.1	4.4	10.8	13.6	11	91.2	126.7	106.57	768.2	1264.8	1167
RKML-16	16	52.88	63.81	60.2	63	63	66.8	57.88	73.38	74.2	14.38	14.22	13.41	9.95	10.11	9.04	5	6	5	2.79	3.14	2.48	90	86	85	99	99	97	107	100	101	14	14.2	15.9	25.6	30.4	32.6	3.7	3.8	3.9	11.6	21.2	6	159.46	95.5	142.47	1278.2	1949	882.2
RKML-17	17	58.75	59.25	60	63.88	63.88	70	69.38	60.88	67	13.82	14.07	13.68	8.78	8.93	8.66	3	4	5	3.1	2.48	2.22	77	78	74	85	85	83	97	91	92	19.2	18.5	19.5	20.6	16.6	18	5.48	4.6	3.9	17.2	17.8	7.6	104.26	110	46.6	1393.2	1502.6	893.6
RKML-18	18	58.88	57.63	60.6	64.88	64.88	72	67.13	67.81	76.8	14.17	13.87	15.95	9.26	9.25	10.12	3	5	5	2.76	2.92	3.24	77	76	75	84	84	84	98	98	91	11.5	8.9	11.4	15.4	13.4	17	3.6	2.8	3.7	26	28	28.6	39.3	47.8	74.07	960.6	1283.2	1320.2
RKML-19	19	59.38	60.56	57.8	69.13	69.13	74.88	76.88	73.44	85.8	13.78	13.83	14.75	8.72	9.34	10.09	4	5	4	3.06	2.78	2.94	81	83	82	90	90	90	104	104	98	9.8	8.9	10.2	14	15	14.9	3.5	4.2	4.1	31.6	27.2	23	42.82	32.4	47.7	1040.6	1101	773.6
RKML-20	20	55.63	56.38	57	60.75	60.75	70.6	72.44	72.63	78.4	14.65	15.48	15.4	8.83	10.28	9.89	4	4	4	3.28	3.72	3.86	79	78	73	90	88	80	102	90	90	10.16	8.2	7	17.3	16.6	15.5	3.86	3.7	3.7	30.8	37	26	22.92	32.6	37.58	948.8	1036.2	872.8
RKML-21	21	50.13	54.88	66.2	63.75	63.75	79.2	67.13	70.5	85.6	13.58	13.22	14.99	8.64	8.17	9.79	3	3	4	2.7	2.62	3.08	79	76	77	90	84	90	96	94	92	11.8	7.5	7.7	11.1	12.8	11.2	4.3	3.2	3.3	37.4	41.6	43.8	24.92	21.4	50.75	759.2	882.8	1202.4
RKML-22	22	61.75	65.5	64.4	72.5	72.5	83.6	74.38	87.25	88.6	14.69	14.36	16.18	9.36	8.79	10.26	4	5	6	4.29	3.64	4.54	78	76	75	88	84	83	94	90	86	9.6	9.6	10.5	13.14	14	15.2	4.34	4.2	6	35.6	28.2	40.8	50.14	46.2	67.12	973.6	1186.8	1574
RKML-23	23	56.13	52.75	52.2	69.19	69.19	63	69.31	66.63	71.2	15.36	14.14	14.88	8.61	8.5	9	2	3	4	3.18	2.92	3.08	81	83	76	89	89	85	101	101	94	8.1	7.7	9.1	11.2	10.9	10.6	3.4	3.7	3.9	32.2	21	34.4	24.5	28.1	26.16	1044.4	579.8	763.6
RKML-24	24	54.75	53.5	65.6	69	69	76.2	74.06	71.88	79.2	14.28	15.33	15.05	8.82	9.28	9.16	3	4	5	3.66	3.75	3.84	81	79	81	89	86	86	103	96	93	9	8.4	8.6	17.6	17.3	17.2	3.6	3.3	4.3	24.4	19	21.4	30.92	102.2	53.87	800.8	1172	1003.6
RKML-25	25	50.63	51	53.2	60.13	60.13	60.4	64	63.63	65.2	13.2	12.16	12.63	7.72	7.81	8.26	3	3	3	2.88	3.08	3.49	79	74	75	90	90	88	98	92	90	9.4	8.9	8.9	14.9	14.3	14.8	4.5	4.4	4.6	30.6	29.6	28	42.37	40.8	44.4	1148.4	1109.4	1243.2
RKML-26	26	53	66.13	64.2	66.56	66.56	84.3	70.25	80.38	88.6	13.02	14.54	15.2	7.91	9.17	9.84	6	6	6	3.77	3.98	3.78	57	59	54	69	69	67	81	85	85	13.1	14.2	11.9	24	27.4	24.4	3.6	3.9	3.8	18.8	18.4	26.2	83.24	84	107.79	1191	1881.6	1941.4
RKML-27	27	59.5	55.75	64	71.63	71.63	72.6	72.5	63.88	73.5	14.07	14.26	16.25	8.77	7.78	9.82	5	4	5	3.01	2.42	2.85	62	65	64	73	70	70	72	90	87	10.2	10.1	9.4	16.4	18.9	18.9	2.7	3.4	3.28	18	22.4	24.8	50.76	50.6	62.5	974	1225.4	1215.6
RKML-28	28	54.38	54.38	63	65	65	71.8	64.63	48.75	77.4	13.75	11.21	13.67	8.34	6.49	7.23	4	4	3	3.03	2.36	2.99	64	60	60	75	68	69	80	83	79	8.9	8.6	9.2	17	13.4	14.3	3.62	3.4	3.6	24.2	12.2	23	40.03	368.4	39.96	998.2	573	785.8
RKML-29	29	53.75	54.13	58.6	63.19	63.19	63	71.13	76.13	72.2	13.39	13.13	15.12	7.52	7.57	9.13	3	4	5	2.96	2.34	2.09	67	64	68	79	73	74	80	97	98	8.5	8	8.5	15.3	13.4	12.7	2.9	2.86	3.9	15.2	14.2	14.2	46.42	42.4	43.87	709.24	505.4	492.2
RKML-30	30	54.75	53.25	54.4	56.94	56.94	62.3	65.75	50.13	65.6	13.3	12.79	13.91	8.32	7.5	7.52	4	3	4	3.26	2	2.3	57	59	57	67	69	65	70	86	72	9.8	10.7	10.46	18.6	18.3	18	2.8	2.96	3.46	20.8	14	20.4	50.82	51	50.65	1120.75	686.6	929.8
RKML-31	31	53.5	59.56	63	63.6	63.6	76.6	64.44	67.75	86	14.19	15.09	15.9	8.43	9.36	9.82	6	5	4	3.8	3.5	3.82	59	55	58	68	62	64	77	67	75	14.4	10.7	9	25.8	19.8	16.8	4.8	4.24	3.24	19.4	13.2	28	36.13	38.9	38.31	801.8	706.4	975.8
RKML-32	32	53	51.13	58	58.63	58.63	70.6	68.06	58.75	73	13.26	15.04	14.24	7.65	9.04	8.77	2	4	4	2.43	2.77	2.5	60	58	56	72	70	62	79	72	70	16.8	8.3	7.9	30.7	15.6	14.7	5	2.96	3	17	14.8	21.2	40.7	34.2	43.52	777.8	529.2	751.2
RKML-33	33	50.63	55.5	55	54.63	54.63	67.6	61	69.63	69.4	12.12	14.61	15.11	6.82	8.53	8.3	3	3	2	2.4	2.78	2.78	62	62	64	70	68	70	74	78	80	9.59	9.5	9	15.32	16	17.6	3.46	3.56	3.02	19.4	15.2	17.6	43.05	45.6	53.15	835.8	832.8	1010.8
RKML-34	34	65.5	77.75	74.4	66.5	66.5	81.4	81.63	75.25	88.4	12.74	14.63	16.45	8.26	10.16	9.86	6	7	5	3.52	4.25	4.7	74	72	70	79	75	76	84	85	86	18.2	17.6	15.2	31.8	31.2	32.14	6.2	5.9	7.36	11	15.8	11	182.4	138.2	227.96	2014.6	2762.6	2378
RKML-35	35	60.63	85.38	61.8	72.19	72.19	72.8	82.81	95.25	82.4	10.59	20.96	17.68	8	15.19	14	5	6	5	3.04	8.1	5.5	89	85	86	93	93	90	103	103	102	15.4	19.2	19.2	34.4	33.7	33.7	6.18	5.9	5.9	8	6.2	5.8	183.43	201.6	204.4	1882	1797.2	1216
PPC	36	62.06	82.38	61.2	70.81	70.81	72.2	79.63	94.63	80.4	12.49	19.43	16.45	7.83	12.22	11.3	4	5	6	8.5	6.76	5.34	60	66	62	64	70	68	70	78	75	15.3	16.4	14.8	11.8	13.4	11.8	5.4	6.1	5.4	25.6	39.2	36.4	41.06	45.2	51.64	1055.96	1349.4	2054.4
PPL	37	55.5	71.75	65.8	53.13	53.13	70.6	61.63	78	71.8	14.48	15.4	14.42	9.26	9.27	9.2	6	6	5	5.03	6.2	5.13	76	56	54	84	62	62	90	69	69	25.4	26.7	17.8	11.6	13.1	9.6	7.7	6.78	5.84	16	17.4	21	77.15	66.6	51.13	1138.4	898.4	1073.2
S.PRATIBHA	38	65.13	65.81	66	62.81	62.81	63.5	65.38	68.19	63.8	17.2	12.61	16.14	11.16	9.84	10.82	5	5	6	6.53	4.6	6.54	58	62	64	66	69	69	70	74	76	18	18.5	18.6	19	19.2	19.4	7.2	6.6	7.34	10.6	8.6	8.8	115.96	128	192.4	1445	931	1693.2
S.SHYAMLI	39	54.63	61.5	48	65.5	65.5	66	57.81	59.44	58.2	14.94	10.97	14.91	9.99	8.15	9.05	4	2	3	3.67	3.3	3.8	51	58	55	58	64	60	64	70	64	8.6	10	8.4	18.4	20.3	18.5	2.9	3.1	2.72	6.2	6.4	6.8	252.31	222.2	245.2	1560.6	1218.2	1679
[truncated: 9 more columns]
